# Supplementary material for: PPARG (Pro12Ala) genetic variant and risk of T2DM: a systematic review and meta-analysis
Source: PubMed Central journal article supplement (PMC7391673; doi:10.1038/s41598-020-69363-7), 2020-07-29

## **PPARG (Pro12Ala) genetic variant and risk of T2DM: a systematic review and meta-analysis**

Negar Sarhangi <sup>1</sup>, Farshad Sharifi <sup>2</sup>, Leila Hashemian <sup>3</sup>, Maryam Hassani Doabsari <sup>3</sup>, Katayoun Heshmatzad <sup>3</sup>, Marzieh Rahbaran <sup>3</sup>, Seyed Hamid Jamaldini <sup>3</sup>, Hamid Reza Aghaei Meybodi <sup>1,4</sup>, Mandana Hasanzad <sup>1,3,\*</sup>

<sup>1</sup> Personalized Medicine Research Center, Endocrinology and Metabolism Clinical Sciences Institute, Tehran University of Medical Sciences, Tehran 1411413137, Iran

<sup>2</sup> Elderly Health Research Center, Endocrinology and Metabolism Population Sciences Institute, Tehran University of Medical Sciences, Tehran 1411413137, Iran

<sup>3</sup> Medical Genomics Research Center, Tehran Medical Sciences, Islamic Azad University, Tehran 1916893813, Iran

<sup>4</sup> Endocrinology and Metabolism Research Center, Endocrinology and Metabolism Clinical Sciences Institute, Tehran University of Medical Sciences, Tehran 1411413137, Iran

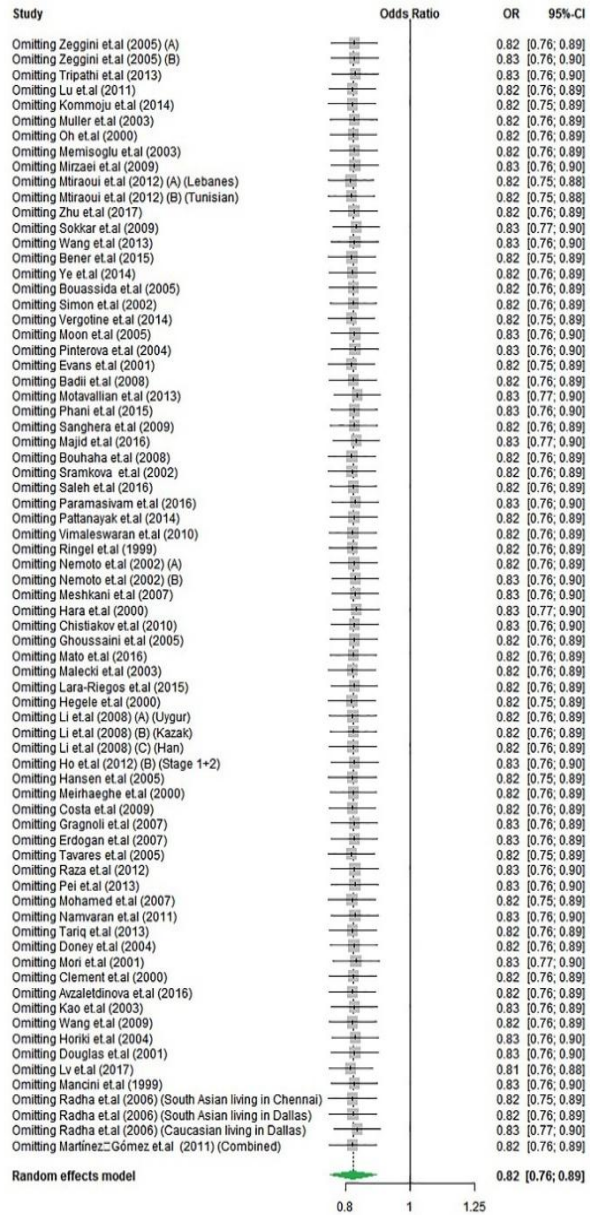

A

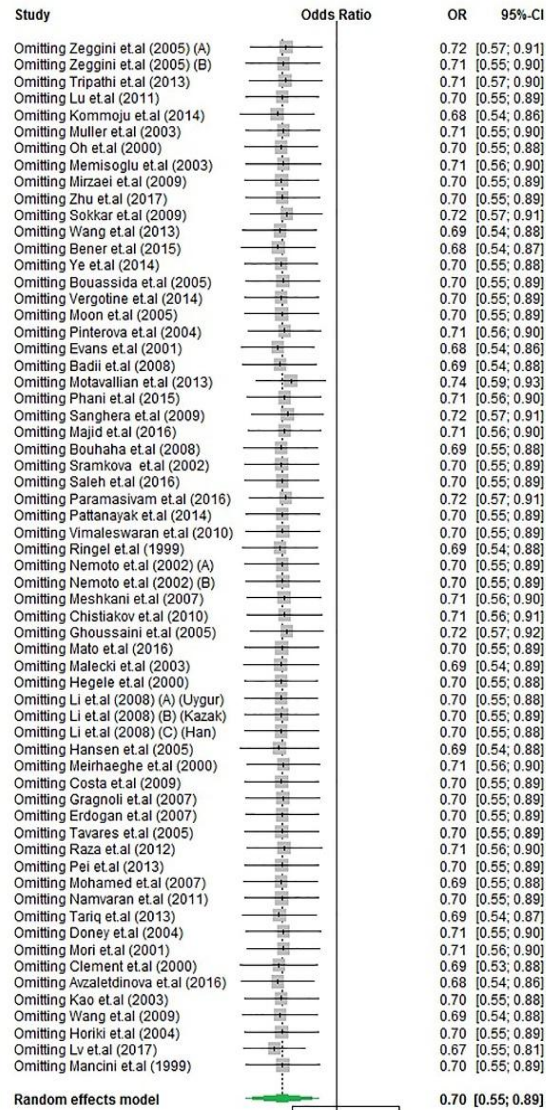

B

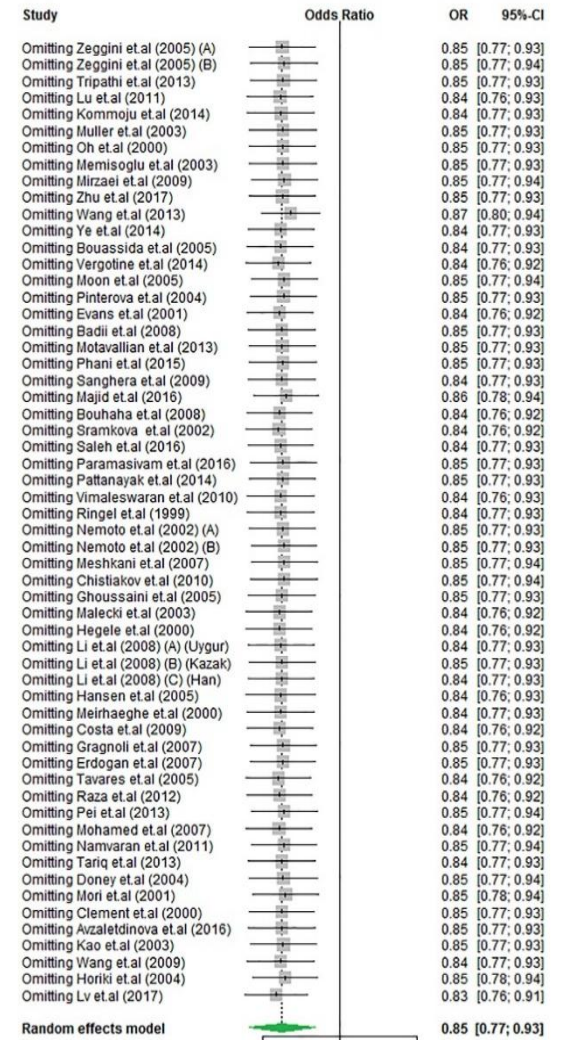



| Study                                | Odds Ratio | OR   | 95%-CI       |
|--------------------------------------|------------|------|--------------|
| Omitting Zeggini et al (2005) (A)    |            | 0.83 | [0.70; 0.98] |
| Omitting Zeggini et al (2005) (B)    |            | 0.82 | [0.70; 0.97] |
| Omitting Tripathi et al (2013)       |            | 0.82 | [0.70; 0.97] |
| Omitting Lu et al (2011)             |            | 0.82 | [0.69; 0.96] |
| Omitting Kommoju et al (2014)        |            | 0.79 | [0.67; 0.94] |
| Omitting Muller et al (2003)         |            | 0.82 | [0.70; 0.97] |
| Omitting Oh et al (2000)             |            | 0.81 | [0.69; 0.96] |
| Omitting Memisoglu et al (2003)      |            | 0.82 | [0.70; 0.97] |
| Omitting Mirzaei et al (2009)        |            | 0.81 | [0.69; 0.96] |
| Omitting Zhu et al (2017)            |            | 0.82 | [0.69; 0.96] |
| Omitting Sokkar et al (2009)         |            | 0.82 | [0.70; 0.97] |
| Omitting Wang et al (2013)           |            | 0.81 | [0.68; 0.95] |
| Omitting Bener et al (2015)          |            | 0.80 | [0.68; 0.95] |
| Omitting Ye et al (2014)             |            | 0.82 | [0.69; 0.96] |
| Omitting Bouassida et al (2005)      |            | 0.82 | [0.70; 0.97] |
| Omitting Vergotine et al (2014)      |            | 0.82 | [0.69; 0.96] |
| Omitting Moon et al (2005)           |            | 0.82 | [0.69; 0.96] |
| Omitting Pinterova et al (2004)      |            | 0.82 | [0.70; 0.97] |
| Omitting Evans et al (2001)          |            | 0.80 | [0.68; 0.95] |
| Omitting Badii et al (2008)          |            | 0.81 | [0.69; 0.95] |
| Omitting Motavallian et al (2013)    |            | 0.88 | [0.75; 1.05] |
| Omitting Phani et al (2015)          |            | 0.83 | [0.70; 0.97] |
| Omitting Sanghera et al (2009)       |            | 0.83 | [0.71; 0.98] |
| Omitting Majid et al (2016)          |            | 0.82 | [0.70; 0.96] |
| Omitting Bouhaha et al (2008)        |            | 0.82 | [0.69; 0.96] |
| Omitting Sramkova et al (2002)       |            | 0.82 | [0.70; 0.97] |
| Omitting Saleh et al (2016)          |            | 0.82 | [0.70; 0.96] |
| Omitting Paramasivam et al (2016)    |            | 0.83 | [0.70; 0.98] |
| Omitting Pattanayak et al (2014)     |            | 0.82 | [0.69; 0.96] |
| Omitting Vimalaswaran et al (2010)   |            | 0.82 | [0.70; 0.97] |
| Omitting Ringel et al (1999)         |            | 0.81 | [0.69; 0.96] |
| Omitting Nemoto et al (2002) (A)     |            | 0.82 | [0.69; 0.96] |
| Omitting Nemoto et al (2002) (B)     |            | 0.82 | [0.69; 0.96] |
| Omitting Meshkani et al (2007)       |            | 0.82 | [0.70; 0.97] |
| Omitting Chistiakov et al (2010)     |            | 0.83 | [0.70; 0.98] |
| Omitting Ghoussaini et al (2005)     |            | 0.84 | [0.71; 0.99] |
| Omitting Mato et al (2016)           |            | 0.82 | [0.69; 0.96] |
| Omitting Malecki et al (2003)        |            | 0.82 | [0.69; 0.97] |
| Omitting Hegele et al (2000)         |            | 0.82 | [0.69; 0.96] |
| Omitting Li et al (2008) (A) (Uyгур) |            | 0.82 | [0.69; 0.96] |
| Omitting Li et al (2008) (B) (Kazak) |            | 0.82 | [0.69; 0.96] |
| Omitting Li et al (2008) (C) (Han)   |            | 0.82 | [0.69; 0.96] |
| Omitting Hansen et al (2005)         |            | 0.80 | [0.67; 0.95] |
| Omitting Meirhaeghe et al (2000)     |            | 0.82 | [0.70; 0.97] |
| Omitting Costa et al (2009)          |            | 0.82 | [0.69; 0.96] |
| Omitting Gragnoli et al (2007)       |            | 0.82 | [0.70; 0.96] |
| Omitting Erdogan et al (2007)        |            | 0.82 | [0.69; 0.96] |
| Omitting Tavares et al (2005)        |            | 0.82 | [0.69; 0.96] |
| Omitting Raza et al (2012)           |            | 0.86 | [0.72; 1.01] |
| Omitting Pei et al (2013)            |            | 0.82 | [0.69; 0.96] |
| Omitting Mohamed et al (2007)        |            | 0.81 | [0.69; 0.96] |
| Omitting Namvaran et al (2011)       |            | 0.82 | [0.69; 0.96] |
| Omitting Tariq et al (2013)          |            | 0.81 | [0.69; 0.95] |
| Omitting Doney et al (2004)          |            | 0.82 | [0.69; 0.97] |
| Omitting Mori et al (2001)           |            | 0.82 | [0.70; 0.97] |
| Omitting Clement et al (2000)        |            | 0.82 | [0.69; 0.96] |
| Omitting Avzaletdinova et al (2016)  |            | 0.80 | [0.67; 0.94] |
| Omitting Kao et al (2003)            |            | 0.82 | [0.69; 0.96] |
| Omitting Wang et al (2009)           |            | 0.81 | [0.69; 0.96] |
| Omitting Horiki et al (2004)         |            | 0.82 | [0.69; 0.96] |
| Omitting Lv et al (2017)             |            | 0.74 | [0.62; 0.88] |
| Omitting Mancini et al (1999)        |            | 0.82 | [0.69; 0.96] |

Fixed effect model  
  
 0.75 1 1.5  
 0.82 [0.69; 0.96]

D

| Study                                | Odds Ratio | OR   | 95%-CI       |
|--------------------------------------|------------|------|--------------|
| Omitting Zeggini et al (2005) (A)    |            | 0.84 | [0.77; 0.92] |
| Omitting Zeggini et al (2005) (B)    |            | 0.85 | [0.77; 0.92] |
| Omitting Tripathi et al (2013)       |            | 0.85 | [0.77; 0.92] |
| Omitting Lu et al (2011)             |            | 0.84 | [0.77; 0.92] |
| Omitting Kommoju et al (2014)        |            | 0.84 | [0.77; 0.92] |
| Omitting Muller et al (2003)         |            | 0.84 | [0.77; 0.92] |
| Omitting Oh et al (2000)             |            | 0.84 | [0.77; 0.92] |
| Omitting Memisoglu et al (2003)      |            | 0.84 | [0.77; 0.92] |
| Omitting Mirzaei et al (2009)        |            | 0.85 | [0.78; 0.93] |
| Omitting Zhu et al (2017)            |            | 0.84 | [0.77; 0.92] |
| Omitting Sokkar et al (2009)         |            | 0.85 | [0.78; 0.92] |
| Omitting Wang et al (2013)           |            | 0.85 | [0.77; 0.93] |
| Omitting Bener et al (2015)          |            | 0.84 | [0.76; 0.91] |
| Omitting Ye et al (2014)             |            | 0.84 | [0.77; 0.92] |
| Omitting Bouassida et al (2005)      |            | 0.84 | [0.77; 0.92] |
| Omitting Vergotine et al (2014)      |            | 0.83 | [0.76; 0.91] |
| Omitting Moon et al (2005)           |            | 0.85 | [0.77; 0.92] |
| Omitting Pinterova et al (2004)      |            | 0.85 | [0.77; 0.92] |
| Omitting Evans et al (2001)          |            | 0.84 | [0.76; 0.91] |
| Omitting Badii et al (2008)          |            | 0.84 | [0.77; 0.92] |
| Omitting Motavallian et al (2013)    |            | 0.85 | [0.78; 0.92] |
| Omitting Phani et al (2015)          |            | 0.84 | [0.77; 0.92] |
| Omitting Sanghera et al (2009)       |            | 0.84 | [0.77; 0.92] |
| Omitting Majid et al (2016)          |            | 0.85 | [0.78; 0.93] |
| Omitting Bouhaha et al (2008)        |            | 0.84 | [0.77; 0.91] |
| Omitting Sramkova et al (2002)       |            | 0.84 | [0.77; 0.91] |
| Omitting Saleh et al (2016)          |            | 0.84 | [0.77; 0.92] |
| Omitting Paramasivam et al (2016)    |            | 0.85 | [0.78; 0.92] |
| Omitting Pattanayak et al (2014)     |            | 0.84 | [0.77; 0.92] |
| Omitting Vimalaswaran et al (2010)   |            | 0.84 | [0.77; 0.92] |
| Omitting Ringel et al (1999)         |            | 0.84 | [0.77; 0.92] |
| Omitting Nemoto et al (2002) (A)     |            | 0.84 | [0.77; 0.92] |
| Omitting Nemoto et al (2002) (B)     |            | 0.85 | [0.78; 0.92] |
| Omitting Meshkani et al (2007)       |            | 0.85 | [0.78; 0.93] |
| Omitting Chistiakov et al (2010)     |            | 0.85 | [0.77; 0.93] |
| Omitting Ghoussaini et al (2005)     |            | 0.84 | [0.77; 0.92] |
| Omitting Mato et al (2016)           |            | 0.84 | [0.77; 0.92] |
| Omitting Malecki et al (2003)        |            | 0.84 | [0.77; 0.91] |
| Omitting Hegele et al (2000)         |            | 0.84 | [0.76; 0.91] |
| Omitting Li et al (2008) (A) (Uyгур) |            | 0.84 | [0.77; 0.92] |
| Omitting Li et al (2008) (B) (Kazak) |            | 0.84 | [0.77; 0.92] |
| Omitting Li et al (2008) (C) (Han)   |            | 0.84 | [0.77; 0.92] |
| Omitting Hansen et al (2005)         |            | 0.84 | [0.76; 0.92] |
| Omitting Meirhaeghe et al (2000)     |            | 0.84 | [0.77; 0.92] |
| Omitting Costa et al (2009)          |            | 0.84 | [0.77; 0.91] |
| Omitting Gragnoli et al (2007)       |            | 0.84 | [0.77; 0.92] |
| Omitting Erdogan et al (2007)        |            | 0.84 | [0.77; 0.92] |
| Omitting Tavares et al (2005)        |            | 0.83 | [0.76; 0.91] |
| Omitting Raza et al (2012)           |            | 0.83 | [0.76; 0.91] |
| Omitting Pei et al (2013)            |            | 0.85 | [0.78; 0.92] |
| Omitting Mohamed et al (2007)        |            | 0.83 | [0.76; 0.91] |
| Omitting Namvaran et al (2011)       |            | 0.85 | [0.78; 0.92] |
| Omitting Tariq et al (2013)          |            | 0.84 | [0.77; 0.92] |
| Omitting Doney et al (2004)          |            | 0.84 | [0.77; 0.92] |
| Omitting Mori et al (2001)           |            | 0.85 | [0.78; 0.93] |
| Omitting Clement et al (2000)        |            | 0.84 | [0.77; 0.92] |
| Omitting Avzaletdinova et al (2016)  |            | 0.84 | [0.77; 0.92] |
| Omitting Kao et al (2003)            |            | 0.84 | [0.77; 0.92] |
| Omitting Wang et al (2009)           |            | 0.84 | [0.77; 0.92] |
| Omitting Horiki et al (2004)         |            | 0.85 | [0.78; 0.93] |
| Omitting Lv et al (2017)             |            | 0.83 | [0.76; 0.90] |
| Omitting Mancini et al (1999)        |            | 0.85 | [0.77; 0.92] |

Random effects model  
  
 0.8 1 1.25  
 0.84 [0.77; 0.92]

E

| Study                                | Odds Ratio | OR   | 95%-CI       |
|--------------------------------------|------------|------|--------------|
| Omitting Zeggini et al (2005) (A)    |            | 0.74 | [0.60; 0.92] |
| Omitting Zeggini et al (2005) (B)    |            | 0.73 | [0.58; 0.91] |
| Omitting Tripathi et al (2013)       |            | 0.74 | [0.59; 0.92] |
| Omitting Lu et al (2011)             |            | 0.73 | [0.58; 0.91] |
| Omitting Kommoju et al (2014)        |            | 0.70 | [0.56; 0.88] |
| Omitting Muller et al (2003)         |            | 0.73 | [0.58; 0.91] |
| Omitting Oh et al (2000)             |            | 0.72 | [0.58; 0.90] |
| Omitting Memisoglu et al (2003)      |            | 0.73 | [0.58; 0.91] |
| Omitting Mirzaei et al (2009)        |            | 0.72 | [0.58; 0.90] |
| Omitting Zhu et al (2017)            |            | 0.73 | [0.58; 0.91] |
| Omitting Sokkar et al (2009)         |            | 0.74 | [0.60; 0.92] |
| Omitting Wang et al (2013)           |            | 0.71 | [0.57; 0.89] |
| Omitting Bener et al (2015)          |            | 0.71 | [0.57; 0.89] |
| Omitting Ye et al (2014)             |            | 0.72 | [0.58; 0.90] |
| Omitting Bouassida et al (2005)      |            | 0.73 | [0.58; 0.91] |
| Omitting Vergotine et al (2014)      |            | 0.72 | [0.58; 0.90] |
| Omitting Moon et al (2005)           |            | 0.72 | [0.58; 0.90] |
| Omitting Pinterova et al (2004)      |            | 0.73 | [0.59; 0.92] |
| Omitting Evans et al (2001)          |            | 0.70 | [0.57; 0.88] |
| Omitting Badii et al (2008)          |            | 0.71 | [0.57; 0.89] |
| Omitting Motavallian et al (2013)    |            | 0.78 | [0.64; 0.96] |
| Omitting Phani et al (2015)          |            | 0.74 | [0.59; 0.92] |
| Omitting Sanghera et al (2009)       |            | 0.75 | [0.60; 0.93] |
| Omitting Majid et al (2016)          |            | 0.73 | [0.59; 0.91] |
| Omitting Bouhaha et al (2008)        |            | 0.72 | [0.58; 0.90] |
| Omitting Sramkova et al (2002)       |            | 0.72 | [0.58; 0.91] |
| Omitting Saleh et al (2016)          |            | 0.73 | [0.58; 0.91] |
| Omitting Paramasivam et al (2016)    |            | 0.74 | [0.59; 0.93] |
| Omitting Pattanayak et al (2014)     |            | 0.73 | [0.58; 0.91] |
| Omitting Vimalaswaran et al (2010)   |            | 0.73 | [0.58; 0.91] |
| Omitting Ringel et al (1999)         |            | 0.72 | [0.57; 0.90] |
| Omitting Nemoto et al (2002) (A)     |            | 0.72 | [0.58; 0.91] |
| Omitting Nemoto et al (2002) (B)     |            | 0.73 | [0.58; 0.91] |
| Omitting Meshkani et al (2007)       |            | 0.73 | [0.59; 0.91] |
| Omitting Chistiakov et al (2010)     |            | 0.73 | [0.58; 0.92] |
| Omitting Ghoussaini et al (2005)     |            | 0.75 | [0.60; 0.93] |
| Omitting Mato et al (2016)           |            | 0.72 | [0.58; 0.90] |
| Omitting Malecki et al (2003)        |            | 0.72 | [0.57; 0.90] |
| Omitting Hegele et al (2000)         |            | 0.72 | [0.58; 0.90] |
| Omitting Li et al (2008) (A) (Uyгур) |            | 0.72 | [0.58; 0.90] |
| Omitting Li et al (2008) (B) (Kazak) |            | 0.72 | [0.58; 0.90] |
| Omitting Li et al (2008) (C) (Han)   |            | 0.72 | [0.58; 0.90] |
| Omitting Hansen et al (2005)         |            | 0.71 | [0.56; 0.90] |
| Omitting Meirhaeghe et al (2000)     |            | 0.73 | [0.58; 0.91] |
| Omitting Costa et al (2009)          |            | 0.72 | [0.58; 0.90] |
| Omitting Gragnoli et al (2007)       |            | 0.73 | [0.58        |

**Figure S5.** Influence plots of the included studies. “A” represents allele (G vs. C); “B” represents homozygote (GG vs. CC); “C” represents heterozygote (CG vs. CC); “D” represents additive (GG vs. CG); “E” represents dominant (CG+GG vs. CC); “F” represents recessive (GG vs. CC+CG); “G” co-dominant model (CG vs. CC+GG). Vertical and horizontal lines represent ORs and 95% CIs pooled by successively excluding one study in turn. Red stroked diamonds represent the overall estimates (pooled ORs and 95% CIs) of population with fixed effect model, and green stroked diamonds symbolize results pooled with random effects model. 95% CI = 95% confidence interval, OR = odds ratio.

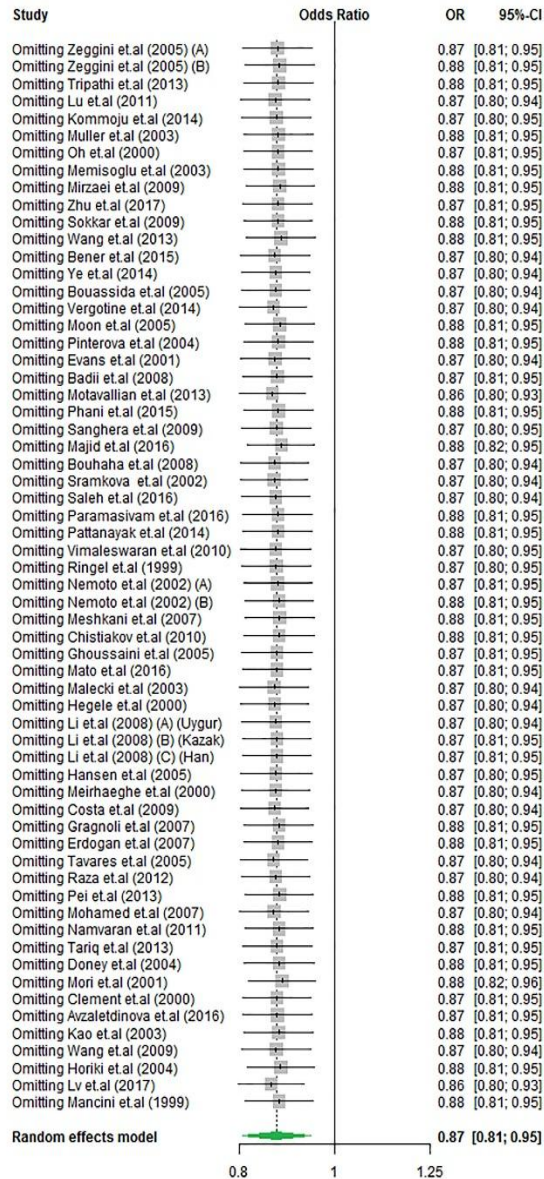

Supplement: 41598_2020_69363_MOESM5_ESM.pdf [file 41598_2020_69363_MOESM5_ESM.pdf]
