# Supplementary material for: PPARG (Pro12Ala) genetic variant and risk of T2DM: a systematic review and meta-analysis
Source: PubMed Central journal article supplement (PMC7391673; doi:10.1038/s41598-020-69363-7), 2020-07-29
Supplement: 41598_2020_69363_MOESM10_ESM.pdf [file 41598_2020_69363_MOESM10_ESM.pdf]

-----  
 PPARG (Pro12Ala) genetic variant and risk of T2DM: a systematic review and meta-analysis

Negar Sarhangi 1, Farshad Sharifi 2, Leila Hashemian 3, Maryam Hassani Doabsari 3, Katayoun Heshmatzad 3, Marzieh Rahbaran 3, Seyed Hamid Jamaladini 3, Hamid Reza Aghaei Meybodi 1, 4, Mandana Hasanzad 1,3,\*

1 Personalized Medicine Research Center, Endocrinology and Metabolism Clinical Sciences Institute, Tehran University of Medical Sciences, Tehran 1411413137, Iran  
 2 Elderly Health Research Center, Endocrinology and Metabolism Population Sciences Institute, Tehran University of Medical Sciences, Tehran 1411413137, Iran  
 3 Medical Genomics Research Center, Tehran Medical Sciences, Islamic Azad University, Tehran 1916893813, Iran  
 4 Endocrinology and Metabolism Research Center, Endocrinology and Metabolism Clinical Sciences Institute, Tehran University of Medical Sciences, Tehran 1411413137, Iran

```
name: <unnamed>
  log: E:\My Documents\Sarhangi study\New\Analysis\Untitled.log
  log type: text
  opened on: 8 Sep 2019, 09:34:52

. do "C:\Users\241143-1\AppData\Local\Temp\STD29000000.tmp"

. metan logOR selog_OR, eform xlabel(0.2,0.4,0.6,0.8) random label(namevar= F
> irstAuthor)
```

| Study                 | ES    | [95% Conf. Interval] |       | % Weight |
|-----------------------|-------|----------------------|-------|----------|
| Majithia et.al (2014) | 0.850 | 0.777                | 0.930 | 20.28    |
| Tai et.al (2004) (A)  | 0.037 | 0.033                | 0.042 | 20.26    |
| Tai et.al (2004) (B)  | 0.032 | 0.026                | 0.040 | 20.21    |
| Tai et.al (2004) (C)  | 0.119 | 0.102                | 0.139 | 20.25    |
| Soriguer et.al (2006) | 0.300 | 0.122                | 0.740 | 19.01    |
| D+L pooled ES         | 0.128 | 0.027                | 0.612 | 100.00   |

Heterogeneity chi-squared = 1973.73 (d.f. = 4) p = 0.000  
 I-squared (variation in ES attributable to heterogeneity) = 99.8%  
 Estimate of between-study variance Tau-squared = 3.1454

Test of ES=1 : z= 2.57 p = 0.010

.  
 end of do-file

. restore

. preserve

```

. keep if GeneticModels=="Additive"
(9 observations deleted)

. do "C:\Users\241143~1\AppData\Local\Temp\STD29000000.tmp"

. metan logOR selog_OR, eform xlabel(0.2,0.4,0.6,0.8) random label(namevar= F
> irstAuthor)
variable logOR not found
r(111);

end of do-file

r(111);

. restore

. restore
nothing to restore
r(622);

. do "C:\Users\241143~1\AppData\Local\Temp\STD29000000.tmp"

. gen logOR=log(OR)

. gen log_low_band=log( Low_OR)

. gen log_up_band=log( Up_OR )

. gen selog_OR= (log_up_band- logOR)/1.96

.
end of do-file

. save "E:\My Documents\Sarhangi study\New\Analysis\OR.dta", replace
file E:\My Documents\Sarhangi study\New\Analysis\OR.dta saved

. preserve

. keep if GeneticModels=="Additive"
(9 observations deleted)

. do "C:\Users\241143~1\AppData\Local\Temp\STD29000000.tmp"

. metan logOR selog_OR, eform xlabel(0.2,0.4,0.6,0.8) random label(namevar= F
> irstAuthor)

```

| Study                | ES    | [95% Conf. Interval] |       | % Weight |
|----------------------|-------|----------------------|-------|----------|
| Chan et.al (2013) (A | 0.620 | 0.343                | 1.120 | 64.39    |
| Chan et.al (2013) (B | 0.590 | 0.151                | 2.310 | 12.09    |
| Chan et.al (2013) (C | 0.270 | 0.078                | 0.930 | 14.72    |
| Chan et.al (2013) (D | 0.210 | 0.042                | 1.040 | 8.80     |
| D+L pooled ES        | 0.496 | 0.308                | 0.797 | 100.00   |

Heterogeneity chi-squared = 2.65 (d.f. = 3) p = 0.449  
I-squared (variation in ES attributable to heterogeneity) = 0.0%  
Estimate of between-study variance Tau-squared = 0.0000

Test of ES=1 : z= 2.90 p = 0.004

.  
end of do-file

. do "C:\Users\241143~1\AppData\Local\Temp\STD29000000.tmp"

. metan logOR selog\_OR, eform xlabel(0.2,0.4,0.6,0.8) fix label(namevar= Firs  
> tAuthor)

| Study                | ES    | [95% Conf. Interval] | % Weight |
|----------------------|-------|----------------------|----------|
| Chan et.al (2013) (A | 0.620 | 0.343 1.120          | 64.39    |
| Chan et.al (2013) (B | 0.590 | 0.151 2.310          | 12.09    |
| Chan et.al (2013) (C | 0.270 | 0.078 0.930          | 14.72    |
| Chan et.al (2013) (D | 0.210 | 0.042 1.040          | 8.80     |
| I-V pooled ES        | 0.496 | 0.308 0.797          | 100.00   |

Heterogeneity chi-squared = 2.65 (d.f. = 3) p = 0.449  
I-squared (variation in ES attributable to heterogeneity) = 0.0%

Test of ES=1 : z= 2.90 p = 0.004  
option fix not allowed  
r(198);

end of do-file

r(198);

. do "C:\Users\241143~1\AppData\Local\Temp\STD29000000.tmp"

. metan logOR selog\_OR, eform xlabel(0.2,0.4,0.6,0.8) label(namevar= FirstAut  
> hor)

| Study                | ES    | [95% Conf. Interval] | % Weight |
|----------------------|-------|----------------------|----------|
| Chan et.al (2013) (A | 0.620 | 0.343 1.120          | 64.39    |
| Chan et.al (2013) (B | 0.590 | 0.151 2.310          | 12.09    |
| Chan et.al (2013) (C | 0.270 | 0.078 0.930          | 14.72    |
| Chan et.al (2013) (D | 0.210 | 0.042 1.040          | 8.80     |
| I-V pooled ES        | 0.496 | 0.308 0.797          | 100.00   |

Heterogeneity chi-squared = 2.65 (d.f. = 3) p = 0.449  
I-squared (variation in ES attributable to heterogeneity) = 0.0%

Test of ES=1 : z= 2.90 p = 0.004

.  
end of do-file

. restore

. preserve

```
. keep if GeneticModels=="Dominanat"
(9 observations deleted)

. do "C:\Users\241143~1\AppData\Local\Temp\STD29000000.tmp"

. metan logOR selog_OR, eform xlabel(0.2,0.4,0.6,0.8) random label(namevar= F
> irstAuthor)
```

| Study                | ES    | [95% Conf. Interval] |       | % Weight |
|----------------------|-------|----------------------|-------|----------|
| Chan et.al (2013) (A | 0.600 | 0.321                | 1.120 | 61.24    |
| Chan et.al (2013) (B | 0.590 | 0.151                | 2.310 | 14.76    |
| Chan et.al (2013) (C | 0.190 | 0.045                | 0.810 | 13.14    |
| Chan et.al (2013) (D | 0.210 | 0.042                | 1.040 | 10.86    |
| D+L pooled ES        | 0.459 | 0.269                | 0.784 | 100.00   |

Heterogeneity chi-squared = 3.17 (d.f. = 3) p = 0.367  
I-squared (variation in ES attributable to heterogeneity) = 5.3%  
Estimate of between-study variance Tau-squared = 0.0204

Test of ES=1 : z= 2.85 p = 0.004

```
.
end of do-file
```

```
. do "C:\Users\241143~1\AppData\Local\Temp\STD29000000.tmp"

. metan logOR selog_OR, eform xlabel(0.2,0.4,0.6,0.8) label(namevar= FirstAut
> hor)
```

| Study                | ES    | [95% Conf. Interval] |       | % Weight |
|----------------------|-------|----------------------|-------|----------|
| Chan et.al (2013) (A | 0.600 | 0.321                | 1.120 | 64.66    |
| Chan et.al (2013) (B | 0.590 | 0.151                | 2.310 | 13.52    |
| Chan et.al (2013) (C | 0.190 | 0.045                | 0.810 | 11.98    |
| Chan et.al (2013) (D | 0.210 | 0.042                | 1.040 | 9.84     |
| I-V pooled ES        | 0.470 | 0.285                | 0.777 | 100.00   |

Heterogeneity chi-squared = 3.17 (d.f. = 3) p = 0.367  
I-squared (variation in ES attributable to heterogeneity) = 5.3%

Test of ES=1 : z= 2.95 p = 0.003

```
.
end of do-file
```

```
. restore

. *(1 variable, 1 observation pasted into data editor)

. *(1 variable, 0 observation pasted into data editor)

. replace parketal2012 = "Park et.al (2012)" in 14
(1 real change made)
```

```

. replace OR = 0.4 in 14
(1 real change made)

. replace Low_OR = 0.18 in 14
(1 real change made)

. replace Up_OR = 0.91 in 14
(1 real change made)

. replace Ethnicity = "Korean" in 14
(1 real change made)

. replace HWE = 0.796 in 14
variable HWE was byte now float
(1 real change made)

. drop log_low_band log_up_band selog_OR

. drop logOR

. do "C:\Users\241143~1\AppData\Local\Temp\STD290000000.tmp"

. gen logOR=log(OR)

. gen log_low_band=log( Low_OR)

. gen log_up_band=log( Up_OR )

. gen selog_OR= (log_up_band- logOR)/1.96

. metan logOR selog_OR, eform xlabel(0.2,0.4,0.6,0.8) random label(namevar= F
> irstAuthor)
Variable FirstAuthor not defined

. metan logOR selog_OR, eform xlabel(0.2,0.4,0.6,0.8) label(namevar= FirstAut
> hor)
Variable FirstAuthor not defined

.
end of do-file

. rename parketal2012 FirstAuthor

. label variable FirstAuthor "FirstAuthor"

. save "E:\My Documents\Sarhangi study\New\Analysis\OR.dta", replace
file E:\My Documents\Sarhangi study\New\Analysis\OR.dta saved

. do "C:\Users\241143~1\AppData\Local\Temp\STD290000000.tmp"

. metan logOR selog_OR, eform xlabel(0.2,0.4,0.6,0.8) random label(namevar= F
> irstAuthor)

```

| Study                 | ES    | [95% Conf. Interval] |       | % Weight |
|-----------------------|-------|----------------------|-------|----------|
| Majithia et.al (2014) | 0.850 | 0.777                | 0.930 | 7.76     |
| Tai et.al (2004) (A)  | 0.037 | 0.033                | 0.042 | 7.76     |
| Tai et.al (2004) (B)  | 0.032 | 0.026                | 0.040 | 7.73     |
| Tai et.al (2004) (C)  | 0.119 | 0.102                | 0.139 | 7.75     |

|                      |  |       |       |       |        |
|----------------------|--|-------|-------|-------|--------|
| Soriguer et.al (2006 |  | 0.300 | 0.122 | 0.740 | 7.24   |
| Chan et.al (2013) (A |  | 0.620 | 0.343 | 1.120 | 7.53   |
| Chan et.al (2013) (B |  | 0.590 | 0.151 | 2.310 | 6.67   |
| Chan et.al (2013) (C |  | 0.270 | 0.078 | 0.930 | 6.84   |
| Chan et.al (2013) (D |  | 0.210 | 0.042 | 1.040 | 6.33   |
| Chan et.al (2013) (A |  | 0.600 | 0.321 | 1.120 | 7.51   |
| Chan et.al (2013) (B |  | 0.590 | 0.151 | 2.310 | 6.67   |
| Chan et.al (2013) (C |  | 0.190 | 0.045 | 0.810 | 6.55   |
| Chan et.al (2013) (D |  | 0.210 | 0.042 | 1.040 | 6.33   |
| Park et.al (2012)    |  | 0.400 | 0.176 | 0.910 | 7.33   |
| -----+               |  |       |       |       |        |
| D+L pooled ES        |  | 0.248 | 0.097 | 0.633 | 100.00 |
| -----+               |  |       |       |       |        |

Heterogeneity chi-squared = 2002.57 (d.f. = 13) p = 0.000  
 I-squared (variation in ES attributable to heterogeneity) = 99.4%  
 Estimate of between-study variance Tau-squared = 2.9408

Test of ES=1 : z= 2.92 p = 0.004

```
. metan logOR selog_OR, eform xlabel(0.2,0.4,0.6,0.8) label(namevar= FirstAut
> hor)
```

| Study                |  | ES    | [95% Conf. Interval] | % Weight |
|----------------------|--|-------|----------------------|----------|
| Majithia et.al (2014 |  | 0.850 | 0.777 0.930          | 47.82    |
| Tai et.al (2004) (A) |  | 0.037 | 0.033 0.042          | 24.08    |
| Tai et.al (2004) (B) |  | 0.032 | 0.026 0.040          | 7.77     |
| Tai et.al (2004) (C) |  | 0.119 | 0.102 0.139          | 16.03    |
| Soriguer et.al (2006 |  | 0.300 | 0.122 0.740          | 0.47     |
| Chan et.al (2013) (A |  | 0.620 | 0.343 1.120          | 1.11     |
| Chan et.al (2013) (B |  | 0.590 | 0.151 2.310          | 0.21     |
| Chan et.al (2013) (C |  | 0.270 | 0.078 0.930          | 0.25     |
| Chan et.al (2013) (D |  | 0.210 | 0.042 1.040          | 0.15     |
| Chan et.al (2013) (A |  | 0.600 | 0.321 1.120          | 0.99     |
| Chan et.al (2013) (B |  | 0.590 | 0.151 2.310          | 0.21     |
| Chan et.al (2013) (C |  | 0.190 | 0.045 0.810          | 0.18     |
| Chan et.al (2013) (D |  | 0.210 | 0.042 1.040          | 0.15     |
| Park et.al (2012)    |  | 0.400 | 0.176 0.910          | 0.57     |
| -----+               |  |       |                      |          |
| I-V pooled ES        |  | 0.220 | 0.207 0.234          | 100.00   |
| -----+               |  |       |                      |          |

Heterogeneity chi-squared = 2002.57 (d.f. = 13) p = 0.000  
 I-squared (variation in ES attributable to heterogeneity) = 99.4%

Test of ES=1 : z= 47.74 p = 0.000

```
.
end of do-file
```

```
. save "E:\My Documents\Sarhangi study\New\Analysis\OR.dta", replace
file E:\My Documents\Sarhangi study\New\Analysis\OR.dta saved
```

```
. preserve
```

```
. keep if GeneticModels=="Dominanat"
(9 observations deleted)
```

```
. do "C:\Users\241143-1\AppData\Local\Temp\STD29000000.tmp"
. metan logOR selog_OR, eform xlabel(0.2,0.4,0.6,0.8) random label(namevar= F
> irstAuthor)
```

| Study                | ES    | [95% Conf. Interval] | % Weight |
|----------------------|-------|----------------------|----------|
| Chan et.al (2013) (A | 0.600 | 0.321 1.120          | 47.10    |
| Chan et.al (2013) (B | 0.590 | 0.151 2.310          | 9.85     |
| Chan et.al (2013) (C | 0.190 | 0.045 0.810          | 8.73     |
| Chan et.al (2013) (D | 0.210 | 0.042 1.040          | 7.17     |
| Park et.al (2012)    | 0.400 | 0.176 0.910          | 27.16    |
| D+L pooled ES        | 0.450 | 0.293 0.691          | 100.00   |

Heterogeneity chi-squared = 3.28 (d.f. = 4) p = 0.513  
I-squared (variation in ES attributable to heterogeneity) = 0.0%  
Estimate of between-study variance Tau-squared = 0.0000

Test of ES=1 : z= 3.65 p = 0.000

```
. metan logOR selog_OR, eform xlabel(0.2,0.4,0.6,0.8) label(namevar= FirstAut
> hor)
```

| Study                | ES    | [95% Conf. Interval] | % Weight |
|----------------------|-------|----------------------|----------|
| Chan et.al (2013) (A | 0.600 | 0.321 1.120          | 47.10    |
| Chan et.al (2013) (B | 0.590 | 0.151 2.310          | 9.85     |
| Chan et.al (2013) (C | 0.190 | 0.045 0.810          | 8.73     |
| Chan et.al (2013) (D | 0.210 | 0.042 1.040          | 7.17     |
| Park et.al (2012)    | 0.400 | 0.176 0.910          | 27.16    |
| I-V pooled ES        | 0.450 | 0.293 0.691          | 100.00   |

Heterogeneity chi-squared = 3.28 (d.f. = 4) p = 0.513  
I-squared (variation in ES attributable to heterogeneity) = 0.0%

Test of ES=1 : z= 3.65 p = 0.000

```
.
end of do-file
```

```
. restore
```

```
. tab FirstAuthor
```

| FirstAuthor                             | Freq. | Percent | Cum.  |
|-----------------------------------------|-------|---------|-------|
| Chan et.al (2013) (A) (European-Ameri.. | 2     | 14.29   | 14.29 |
| Chan et.al (2013) (B) (African-Americ.. | 2     | 14.29   | 28.57 |
| Chan et.al (2013) (C) (Hispanic-Ameri.. | 2     | 14.29   | 42.86 |
| Chan et.al (2013) (D) (Asian-American)  | 2     | 14.29   | 57.14 |
| Majithia et.al (2014)                   | 1     | 7.14    | 64.29 |
| Park et.al (2012)                       | 1     | 7.14    | 71.43 |
| Soriguer et.al (2006)                   | 1     | 7.14    | 78.57 |
| Tai et.al (2004) (A) (Chinese)          | 1     | 7.14    | 85.71 |
| Tai et.al (2004) (B) (Malay)            | 1     | 7.14    | 92.86 |

|                               |    |        |        |
|-------------------------------|----|--------|--------|
| Tai et.al (2004) (C) (Indian) | 1  | 7.14   | 100.00 |
| -----+-----                   |    |        |        |
| Total                         | 14 | 100.00 |        |

. exit, clear

Reference: Sterne JA, Bradburn MJ, Egger M. Meta-Analysis in Stata<sup>®</sup>. Systematic reviews in health care: meta-analysis in context. 2001 Jan 1:347-69.
